# Supplementary material for: The stability and nonlinear optical properties: Encapsulation of an excess electron compound LiCN⋯Li within boron nitride nanotubes
Source: Royal Society of Chemistry journal article supplement (doi:10.1039/c1jm14358a), 2011-12-15
Supplement: c1jm14358a.pdf [file c1jm14358a.pdf]

## Electronic Supplementary Information (ESI) for

### The Stability and Nonlinear Optical Properties: Encapsulation of an Excess Electron

#### Compound LiCN...Li within Boron Nitride Nanotubes

Rong-Lin Zhong<sup>a</sup>, Hong-Liang Xu,<sup>a,\*</sup> Shabbir Muhammad,<sup>b</sup> Ji Zhang<sup>a</sup> and Zhong-Min Su<sup>a,\*</sup>

<sup>a</sup>*Institute of Functional Material Chemistry, Faculty of Chemistry, Northeast Normal University,*

*Changchun 130024, Jilin, People's Republic of China, [hlxu@nenu.edu.cn](mailto:hlxu@nenu.edu.cn), [zmsu@nenu.edu.cn](mailto:zmsu@nenu.edu.cn)*

<sup>b</sup>*Department of Materials Engineering Science, Graduate School of Engineering Science, Osaka University, Toyonaka,*

*Osaka 560-8531, Japan*

## Computational Details for Sum-Over-States (SOS) Method

The static first hyperpolarizabilities were calculated by using the sum-over-states (SOS) formula<sup>1</sup>. The expression of the static first hyperpolarizabilities ( $\beta$ ) can be obtained by the application of CIS (or TDDFT) method to the interacting electromagnetic field and microscopic system. The zeroth-order Born-Oppenheimer approximation was also employed to separate the electronic and atomic components of  $\beta$ . The expression for  $\beta_{ijk}$  is

$$\beta_{ijk} = \frac{1}{4\hbar^2} P(i, j, k; -\omega_\sigma, \omega_1, \omega_2) \times \sum_{m \neq g} \sum_{n \neq g} \left[ \frac{(\mu_i)_{gm} (\overline{\mu_j})_{mn} (\mu_k)_{gn}}{(\omega_{mg} - \omega_\sigma - i\gamma_{mg})(\omega_{ng} - \omega_1 - i\gamma_{ng})} \right] \quad (1)$$

Where  $(\mu_i)_{gm}$  is an electronic transition moment along the  $i$  axis of the Cartesian system, between the ground state and the excited state,  $(\overline{\mu_j})_{mn}$  is the dipole difference equal to  $(\mu_i)_{mn} - (\mu_i)_{gg}$ ,  $\omega_{mg}$  is the transition energy,  $\omega_1$  and  $\omega_2$  are the frequencies of the perturbation radiation fields, and  $\omega_\sigma = \omega_1 + \omega_2$  is the polarization response frequency;  $P(i, j, k; -\omega_\sigma, \omega_1, \omega_2)$  indicates all permutations of  $\omega_1, \omega_2$ , and  $\omega_\sigma$  along with associated indices  $i, j$ , and  $k$ ;  $\gamma_{mg}$  is the damping factor. Herein, a self-compiled program using the results of CIS (TDDFT) and the SOS formula to obtain the  $\beta$  value is adopted. Our group has used this method to investigate the NLO properties of a series of compounds<sup>2-4</sup>. In this work, the  $\beta_0$  is defined as following

$$\beta_0 = (\beta_x^2 + \beta_y^2 + \beta_z^2)^{1/2} \quad (2)$$

$$\text{Where } \beta_i = \frac{3}{5}(\beta_{iii} + \beta_{ijj} + \beta_{ikk}), i, j, k = x, y, z \quad (3)$$

The accuracy of the SOS method mainly depends on the convergence of calculation results<sup>2-6</sup>. According to the convergent curves (see the following figure), employing 30 states in the present work is a reasonable approximation for the calculation of values.

Figure. The convergent curves of  $\beta_0$  values as computed in the SOS formalism as a function of the number of excited states for **LiCN...Li** and **1**.

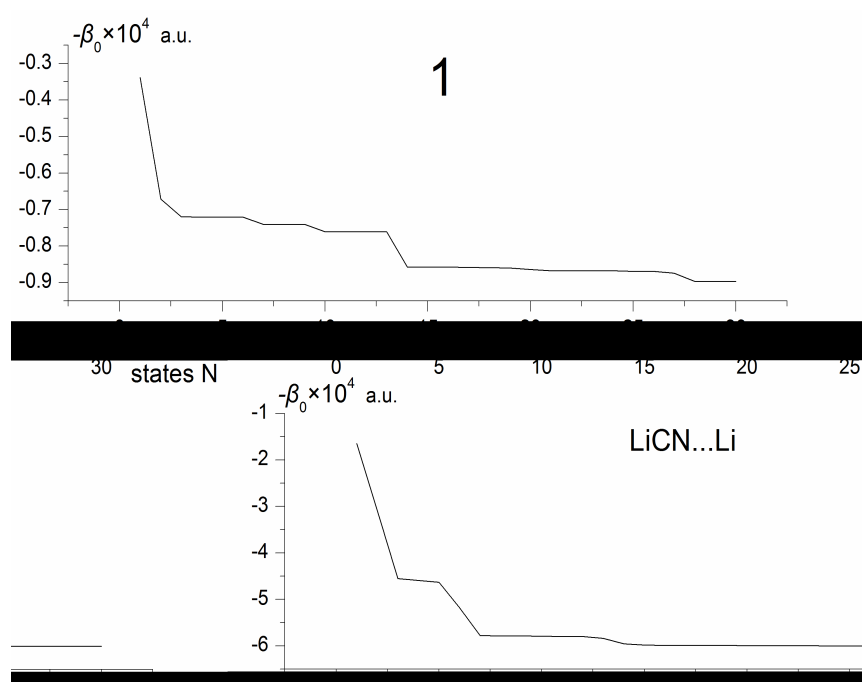

**Table S1.** The First Hyperpolarizability ( $\beta_0$  a.u.) of **LiCN...Li** at QCISD/6-31+G(d) Level, Basis Effect on  $\beta_0$  of **LiCN...Li** Calculated by the CAM-B3LYP Method and Corresponding Time Cost (s).

|                 | CAM-B3LYP |              |               |                  |                   | QCISD/6-31+G(d) |
|-----------------|-----------|--------------|---------------|------------------|-------------------|-----------------|
|                 | 6-31+G(d) | 6-31++G(d,p) | 6-311++G(d,p) | 6-311++G(2df,2p) | 6-311++G(3df,3pd) |                 |
| $\beta_x$       | 310176    | 310176       | 272926        | 265043           | 273677            | 95095           |
| $\beta_y$       | -3103     | -3102        | -2564         | -2582            | -2574             | 105702          |
| $\beta_z$       | 1774      | 1774         | 927           | 876              | 874               | 212621          |
| $\beta_0$       | 310197    | 310197       | 272939        | 265057           | 273690            | 255781          |
| number of basis |           |              |               |                  |                   |                 |
| functions       | 76        | 76           | 88            | 136              | 156               | 76              |
| Time Cost       | 715.5     | 726.0        | 865.0         | 3329.4           | 4479.9            | 6551.9          |

**Table S2.** The Most Important Transition Energies ( $\Delta E$ ) and Oscillating Strengths ( $f_0$ ) of **LiCN...Li**, **1** and **2** Calculated at CAM-B3LYP/6-31+G(d) Level and Fragments Contributions to the Most Important Transition Molecular Orbitals of **1** and **2**.

|                          | <b>LiCN...Li</b> |         | <b>1</b>         |             | <b>2</b>         |             |
|--------------------------|------------------|---------|------------------|-------------|------------------|-------------|
| $f_0$                    | 0.212            |         | 0.082            |             | 0.114            |             |
| $\Delta E$ (eV)          | 1.442            |         | 2.139            |             | 2.327            |             |
| main contribution        | SOMO->           | SOMO->  | SOMO->           | SOMO->      | SOMO->           | SOMO->      |
|                          | LUMO+3           | LUMO+11 | LUMO+3           | LUMO        | LUMO+6           | LUMO+5      |
| contribution coefficient | 0.712            | 0.558   | 0.800            | 0.431       | 0.841            | 0.452       |
| fragment                 |                  |         | <b>LiCN...Li</b> | <b>BNNT</b> | <b>LiCN...Li</b> | <b>BNNT</b> |
| LUMO                     |                  |         | 18.56%           | 81.44%      | 11.17%           | 88.83%      |
| LUMO+3                   |                  |         | 87.24%           | 12.76%      |                  |             |
| LUMO+6                   |                  |         |                  |             | 9.08%            | 90.92%      |

**Table S3.** The Energy Values of **1** System (The Distance of **LiCN...Li** to the B-rich Edge of **1** as a Function of Energy)

|    | distance to the B-rich edge (Å) | energy (eV) |
|----|---------------------------------|-------------|
| 1  | 0                               | -55185.2    |
| 2  | 0.5                             | -55185.1    |
| 3  | 1.0                             | -55184.7    |
| 4  | 1.5                             | -55183.4    |
| 5  | 2.0                             | -55182.6    |
| 6  | 2.5                             | -55181.9    |
| 7  | 3.0                             | -55181.7    |
| 8  | 3.5                             | -55181.4    |
| 9  | 4.0                             | -55181.8    |
| 10 | 4.5                             | -55182.6    |
| 11 | 5.0                             | -55182.9    |
| 12 | 5.5                             | -55182.7    |
| 13 | 6.0                             | -55182.2    |
| 14 | 6.5                             | -55181.9    |
| 15 | 7.0                             | -55181.6    |
| 16 | 7.5                             | -55181.2    |
| 17 | 8.0                             | -55180.9    |
| 18 | 8.5                             | -55181.0    |
| 19 | 9.0                             | -55181.3    |
| 20 | 9.5                             | -55181.7    |
| 21 | 10.0                            | -55182.6    |
| 22 | 10.5                            | -55183.6    |
| 23 | 11.0                            | -55184.5    |
| 24 | 11.5                            | -55185.5    |

**Table S4.** The Energy Values of **1** System (The Distance of **LiCN...Li** to the wall of the BNNT as a Function of Energy)

|   | distance to the wall (Å) | energy (eV) |
|---|--------------------------|-------------|
| 1 | 0.72                     | -55075.5    |
| 2 | 1.22                     | -55119.3    |
| 3 | 1.72                     | -55129.9    |
| 4 | 2.22                     | -55132.5    |
| 5 | 2.72                     | -55129.8    |
| 6 | 3.22                     | -55119.1    |
| 7 | 3.72                     | -55073.9    |

**Figure S1.** The Most Important Transition Molecular Orbitals of **LiCN...Li**, **1** and **2** Calculated at CAM-B3LYP/6-31+G(d) Level



**Figure S2.** The optimized structures of  $\text{LiCN}\dots\text{Li@BNNT}[5,0]$ ,  $\text{LiCN}\dots\text{Li@BNNT}[7,0]$ ,  $\text{LiCN}\dots\text{Li@BNNT}[8,0]$

**Figure S3.** The Variation of Energy in the Process Which **LiCN...Li** Cross the BNNT from the Upper Wall to the Bottom Wall

## Reference and Notes

- 1 B. J. Orr and J. F. Ward, *Mol. Phys.* 1971, **20**, 513–526.
- 2 L. K. Yan, G. C. Yang, W. Guan, Z. M. Su and R. S. Wang, *J. Phys. Chem. B*, 2005, **109**, 22332.
- 3 G. C. Yang, W. Guan, L. K. Yan, Z. M. Su, L. Xu and E. B. Wang, *J. Phys. Chem. B*, 2006, **110**, 23092.
- 4 W. Guan, G. C. Yang, L. K. Yan and Z. M. Su, *Inorg. Chem.*, 2006, **45**, 7864.

### Optimized Cartesian Coordinates

#### LiCN...Li

|    |             |             |             |
|----|-------------|-------------|-------------|
| N  | -0.55313300 | -0.00730100 | 0.00010500  |
| C  | 0.62143500  | -0.00457200 | -0.00014400 |
| Li | -2.53089200 | 0.01394400  | -0.00003900 |
| Li | 2.57866700  | 0.01223500  | 0.00008300  |

#### BNNT

|   |           |           |           |
|---|-----------|-----------|-----------|
| H | 4.520661  | 0.630614  | -2.340269 |
| H | 4.519964  | 2.348281  | -0.625180 |
| H | 4.520115  | 1.716421  | 1.719596  |
| H | 4.520425  | -0.630941 | 2.341241  |
| H | 4.520131  | -2.347270 | 0.625051  |
| H | 4.519962  | -1.717116 | -1.720304 |
| H | -4.818884 | 0.683209  | -2.535278 |
| H | -4.819334 | 2.535797  | -0.676142 |
| H | -4.820318 | 1.849796  | 1.853684  |
| H | -4.820411 | -1.849258 | -1.853273 |
| H | -4.818687 | -0.683558 | 2.536551  |
| H | -4.819280 | -2.536206 | 0.676130  |
| B | -3.645451 | -0.629232 | 2.333169  |
| B | -1.484556 | 0.615776  | 2.308242  |
| B | -1.484500 | -1.692813 | 1.687293  |
| B | 0.676330  | -0.624516 | 2.317145  |
| B | 0.676320  | -2.320820 | 0.618406  |
| B | 2.836912  | -1.699491 | 1.693718  |
| B | 2.836997  | -2.319945 | -0.624612 |
| B | 0.676146  | -1.695421 | -1.699188 |
| B | -1.484339 | -2.310713 | -0.622104 |
| B | -3.645025 | -2.338219 | 0.623240  |
| B | -3.645552 | -1.707262 | -1.710499 |
| B | -3.645552 | 1.707402  | 1.710528  |
| B | -3.645023 | 2.338136  | -0.623294 |
| B | -3.645458 | 0.629149  | -2.332928 |
| B | -1.484537 | -0.615800 | -2.308368 |
| B | -1.484446 | 1.692829  | -1.687338 |
| B | -1.484363 | 2.310751  | 0.622056  |
| B | 0.676293  | 2.320883  | -0.618339 |
| B | 0.676171  | 1.695448  | 1.699105  |
| B | 2.836981  | 1.699549  | -1.693405 |
| B | 2.836963  | 2.320151  | 0.624439  |

|   |           |           |           |
|---|-----------|-----------|-----------|
| B | 2.837129  | -0.618487 | -2.316921 |
| B | 2.837117  | 0.618205  | 2.316878  |
| N | -2.934022 | 1.760543  | -1.754949 |
| N | -2.934094 | -0.639532 | -2.398663 |
| N | -0.769467 | 0.650740  | -2.415467 |
| N | -0.769657 | -1.768535 | -1.772504 |
| N | 1.389144  | -0.644644 | -2.417707 |
| N | 1.388900  | 1.773177  | -1.767610 |
| N | 3.512675  | 0.662055  | -2.457012 |
| N | 3.511764  | -1.801145 | -1.804625 |
| N | 3.511851  | 2.464261  | -0.656202 |
| N | 3.511916  | 1.800363  | 1.803862  |
| N | 3.512016  | -2.463181 | 0.655980  |
| N | 3.512443  | -0.662374 | 2.458130  |
| N | 1.389107  | 0.644542  | 2.417411  |
| N | 1.388847  | -1.773431 | 1.767904  |
| N | 1.388716  | 2.418860  | 0.651180  |
| N | 1.388733  | -2.418511 | -0.651074 |
| N | -0.769410 | 2.419716  | -0.644560 |
| N | -0.769410 | -2.419637 | 0.644520  |
| N | -0.769664 | 1.768492  | 1.772402  |
| N | -0.769525 | -0.650775 | 2.415523  |
| N | -2.934136 | 0.639494  | 2.398382  |
| N | -2.934075 | -1.760487 | 1.754814  |
| N | -2.934130 | 2.400743  | 0.645874  |
| N | -2.934116 | -2.400690 | -0.645956 |
| B | 0.676404  | 0.624422  | -2.317099 |

## 1

|   |           |           |           |
|---|-----------|-----------|-----------|
| H | 4.582960  | -0.614411 | -2.372710 |
| H | 4.581781  | 1.750969  | -1.712670 |
| H | 4.578851  | 2.372439  | 0.660950  |
| H | 4.579241  | 0.616519  | 2.379260  |
| H | 4.581090  | -1.745061 | 1.714400  |
| H | 4.580430  | -2.375071 | -0.657670 |
| H | -4.735010 | -0.683488 | -2.648020 |
| H | -4.735749 | 1.951122  | -1.919260 |
| H | -4.737039 | 2.642242  | 0.731480  |
| H | -4.735480 | -2.638198 | -0.733870 |
| H | -4.737039 | 0.684312  | 2.655560  |
| H | -4.736570 | -1.957088 | 1.918230  |
| B | -3.577489 | 0.615852  | 2.389860  |

|   |           |           |           |
|---|-----------|-----------|-----------|
| B | -1.415159 | 1.718941  | 1.749800  |
| B | -1.414140 | -0.657769 | 2.363750  |
| B | 0.715401  | 0.615960  | 2.384530  |
| B | 0.716650  | -1.758210 | 1.726540  |
| B | 2.895200  | -0.646960 | 2.333510  |
| B | 2.896150  | -2.346400 | 0.605790  |
| B | 0.717090  | -2.376730 | -0.659520 |
| B | -1.413260 | -2.377939 | 0.612990  |
| B | -3.576430 | -1.762828 | 1.728060  |
| B | -3.575070 | -2.377208 | -0.660960 |
| B | -3.577319 | 2.378522  | 0.658530  |
| B | -3.574879 | 1.759822  | -1.730100 |
| B | -3.573970 | -0.616128 | -2.388200 |
| B | -1.412460 | -1.719749 | -1.752160 |
| B | -1.411729 | 0.657841  | -2.366060 |
| B | -1.413789 | 2.377981  | -0.614560 |
| B | 0.717401  | 1.760880  | -1.725350 |
| B | 0.715731  | 2.375850  | 0.660010  |
| B | 2.898151  | 0.649420  | -2.329210 |
| B | 2.895231  | 2.347960  | -0.603720 |
| B | 2.897160  | -1.699010 | -1.726700 |
| B | 2.893631  | 1.697780  | 1.728790  |
| N | -2.859459 | 0.673281  | -2.424230 |
| N | -2.860200 | -1.761259 | -1.794330 |
| N | -0.706460 | -0.653259 | -2.532420 |
| N | -0.707710 | -2.520439 | -0.700480 |
| N | 1.449160  | -1.747600 | -1.779010 |
| N | 1.449951  | 0.667730  | -2.398790 |
| N | 3.572200  | -0.637310 | -2.465280 |
| N | 3.569550  | -2.466100 | -0.683270 |
| N | 3.571841  | 1.823700  | -1.785800 |
| N | 3.567951  | 2.462830  | 0.685430  |
| N | 3.571140  | -1.818660 | 1.786230  |
| N | 3.568571  | 0.639640  | 2.472810  |
| N | 1.446081  | 1.748580  | 1.780330  |
| N | 1.447340  | -0.667600 | 2.403450  |
| N | 1.447801  | 2.419380  | -0.623220 |
| N | 1.448400  | -2.415920 | 0.623850  |
| N | -0.707359 | 1.867231  | -1.832620 |
| N | -0.708470 | -1.866219 | 1.831050  |
| N | -0.709859 | 2.519791  | 0.699420  |
| N | -0.710069 | 0.653091  | 2.530290  |
| N | -2.864069 | 1.758661  | 1.790400  |
| N | -2.862580 | -0.673779 | 2.420330  |

|    |           |           |           |
|----|-----------|-----------|-----------|
| N  | -2.861949 | 2.435271  | -0.630050 |
| N  | -2.861140 | -2.436149 | 0.627940  |
| N  | -1.554649 | -0.002069 | -0.003970 |
| C  | -0.393259 | -0.001309 | 0.001550  |
| Li | -3.375939 | 0.004542  | 0.015890  |
| Li | 1.588561  | -0.013220 | -0.017510 |
| B  | 0.718320  | -0.615910 | -2.386920 |

## 2

|   |             |             |             |
|---|-------------|-------------|-------------|
| H | -4.52361300 | -1.74856200 | -1.69721700 |
| H | -4.52241500 | -2.34049300 | 0.66577800  |
| H | -4.52103600 | -0.59626400 | 2.36558800  |
| H | -4.52109900 | 1.74554100  | 1.69897500  |
| H | -4.52275400 | 2.34582900  | -0.66138100 |
| H | -4.52411400 | 0.59754000  | -2.36012500 |
| H | 4.79435500  | -1.94753100 | -1.89528500 |
| H | 4.79495500  | -2.61953400 | 0.73931000  |
| H | 4.79607300  | -0.66763800 | 2.63984200  |
| H | 4.79232700  | 0.66545800  | -2.63945000 |
| H | 4.79713100  | 1.95269000  | 1.89520300  |
| H | 4.79417700  | 2.61961200  | -0.74559600 |
| B | 3.64287300  | 1.74515800  | 1.69307600  |
| B | 1.46432100  | 0.66724800  | 2.35348400  |
| B | 1.46333700  | 2.37417500  | 0.59907600  |
| B | -0.67268700 | 1.76196700  | 1.71277100  |
| B | -0.67424600 | 2.36520700  | -0.66882400 |
| B | -2.83070400 | 2.38200800  | 0.60347800  |
| B | -2.83313400 | 1.71383000  | -1.75978700 |
| B | -0.67556200 | 0.60234000  | -2.38159400 |
| B | 1.46164900  | 1.70648300  | -1.75647200 |
| B | 3.63976400  | 2.34195800  | -0.66608400 |
| B | 3.63781400  | 0.59494300  | -2.35926800 |
| B | 3.64235100  | -0.59653500 | 2.35730700  |
| B | 3.64033800  | -2.34228000 | 0.66117900  |
| B | 3.63895300  | -1.74336900 | -1.69522600 |
| B | 1.46125800  | -0.66772700 | -2.35534300 |
| B | 1.46219600  | -2.37472500 | -0.60020000 |
| B | 1.46369800  | -1.70666000 | 1.75518200  |
| B | -0.67388400 | -2.36443000 | 0.67168000  |
| B | -0.67254600 | -0.60161400 | 2.38301500  |
| B | -2.83230400 | -2.38281300 | -0.60086500 |
| B | -2.83061500 | -1.71063700 | 1.76311300  |
| B | -2.83389500 | -0.67056000 | -2.36364500 |

|    |             |             |             |
|----|-------------|-------------|-------------|
| B  | -2.82953000 | 0.66968500  | 2.36339400  |
| N  | 2.91013800  | -2.40940400 | -0.60998700 |
| N  | 2.90909100  | -0.67766800 | -2.39103300 |
| N  | 0.75917700  | -1.86121700 | -1.80837000 |
| N  | 0.75880100  | 0.63555400  | -2.51656100 |
| N  | -1.39695400 | -0.69470900 | -2.44934000 |
| N  | -1.39573800 | -2.47155600 | -0.62309500 |
| N  | -3.51354100 | -1.82393300 | -1.77103900 |
| N  | -3.51385300 | 0.62241200  | -2.46053000 |
| N  | -3.51244300 | -2.44299100 | 0.69386900  |
| N  | -3.51083300 | -0.62199700 | 2.46614300  |
| N  | -3.51273200 | 2.44753400  | -0.69125200 |
| N  | -3.51112200 | 1.82226700  | 1.77208800  |
| N  | -1.39313200 | 0.69540300  | 2.45330500  |
| N  | -1.39410500 | 2.47266000  | 0.62562500  |
| N  | -1.39416700 | -1.77607900 | 1.82898900  |
| N  | -1.39640200 | 1.77533300  | -1.82533700 |
| N  | 0.76062300  | -2.49743500 | 0.70754800  |
| N  | 0.76012700  | 2.49729700  | -0.70829700 |
| N  | 0.76225000  | -0.63587400 | 2.51588000  |
| N  | 0.76190500  | 1.86095600  | 1.80756800  |
| N  | 2.91268900  | 0.67657300  | 2.38569900  |
| N  | 2.91155500  | 2.40790300  | 0.60631400  |
| N  | 2.91209900  | -1.73071700 | 1.77867200  |
| N  | 2.90965900  | 1.73042500  | -1.78243100 |
| N  | -0.46433900 | -0.00045400 | 0.00401700  |
| C  | 0.70274400  | 0.00034400  | -0.00499600 |
| Li | -2.31590700 | -0.00875300 | -0.02568800 |
| Li | 2.78101300  | 0.00372800  | 0.01729100  |
| B  | -0.67485000 | -1.76277900 | -1.71136300 |
